# Supplementary material
Source: Springer Nature journal article supplement (https://www.springermedizin.de/resource/supplementary/12913_2012_2722_MOESM2_ESM.pdf/9531184)
Supplement: MOESM2 [file 9531184]

### Lifestyle diseases VS Genetic disorders

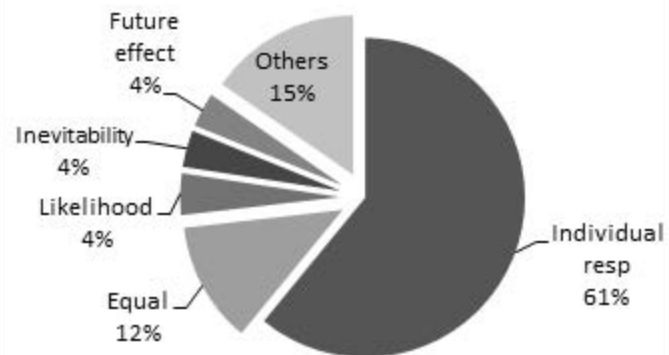

### Hospital infections VS Genetic disorders

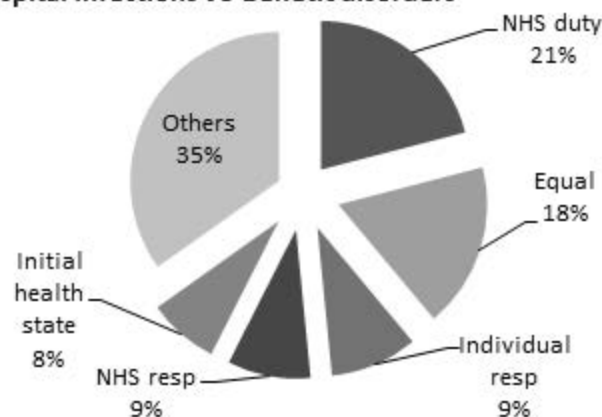

### Sports injuries VS Genetic disorders

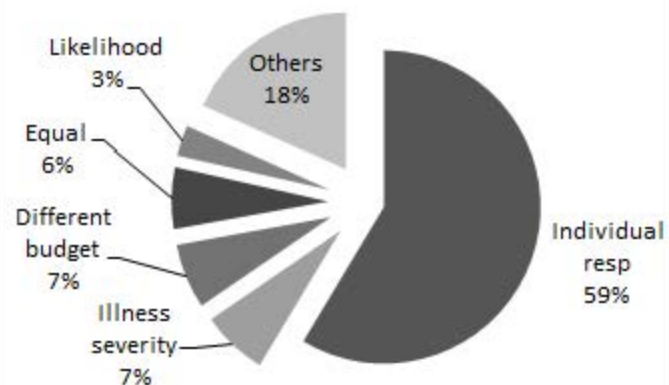

### Medication errors VS Genetics Disorders

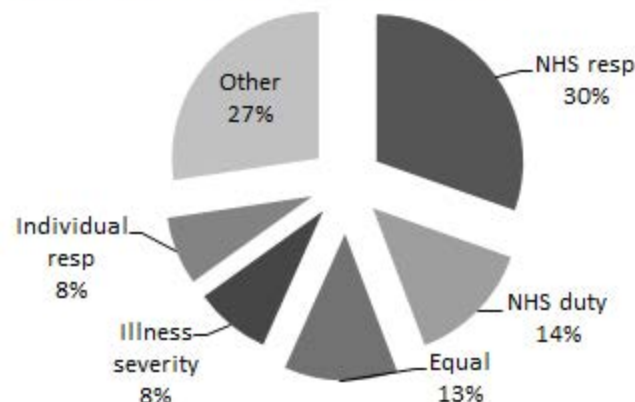

### Staff injuries VS Genetic disorders

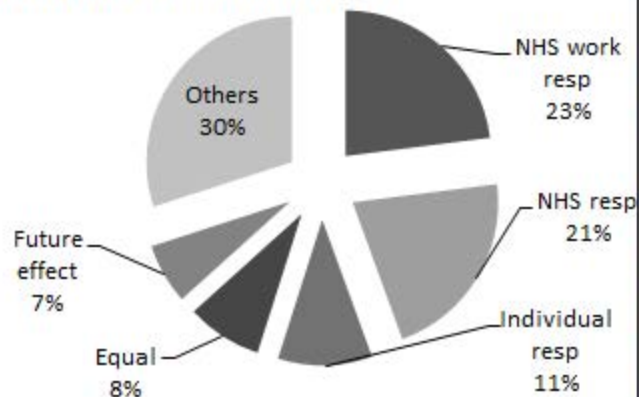

### Codes

**Individual resp:** *individual responsibility; self-inflicted; individual choice*

**Future effects:** *effects carried over time; wider implications*

**Inevitability:** *bound to happen; unavoidable*

**Likelihood:** *incidence; prevalence*

**Initial health state:** *health state before adverse event*

**Equal:** *indifference; equal priority*

**NHS resp:** *NHS culpability; harm inflicted by NHS*

**NHS duty:** *NHS obligation; trust; authority*

**Different budget:** *separate non-NHS provider or payer expected*

**Illness Severity:** *serious illness condition; life threatening*

**NHS work resp:** *NHS workplace or employer responsibility*
